# Supplementary material
Source: PubMed Central journal article supplement (PMC3965317)
Supplement: ismej201389x1.pdf [file ismej201389x1.pdf]

## Supplementary Figure Legends

### **Figure S1. Gradient conditions for the chromatographic methods used in this study.**

The gradients for the RPLC- (A) and HILIC-based (B) analysis. See methods for a complete description of these conditions. For RPLC, solvent B consists of 10mM ammonium formate in methanol; solvent A consists of 10mM ammonium formate in water. For HILIC, solvent B consists of 90% acetonitrile with 15 mM ammonium formate; solvent A is composed of 10 % acetonitrile with 15 mM ammonium formate.

### **Figure S2. Diet alters the taxonomic distribution in the humanized mouse**

**microbiota.** Values represent the average relative abundance across all samples within a group for the RD (n= 3) or PDD (n=3) fed mice. Significant differences between samples ( $p < 0.05$ ) are indicated with an asterisk.

### **Figure S3. Urinary metabolomic profile of humanized mice clusters by diet.**

PCA plot of urine metabolite profiling from humanized mice fed RD (n= 3) or PDD (n=3).

**Figure S4. Simplified model microbiotas alter urine metabolome.** Heat-map of microbe-dependent metabolites from urine samples of gnotobiotic mice colonized with *Bacteroides thetaiotaomicron* (BT), *Bt* and *Bifidobacterium longum* (BTBL) or humanized mice (HUM). Left panel (A) shows features significantly detected in samples of gnotobiotic mice. Right panel (B) shows GF-related features that significantly decrease in the presence of gut microbiota. Fold-changes are relative to the respective metabolomes of GF animals. Significance is defined by fold change  $> 10$  and  $p$  value  $< 0.01$ .  $m/z$  values in red indicate GF related features that disappear in all colonization states.

**Figure S5. Indolelactic acid production by *Bl*.** A. LC-MS spectrum (ESI Positive mode) that shows production of indolelactic acid by *Bl in vitro* (middle) relative to starting medium (top) and an indolelactic acid standard (bottom). B. MS/MS spectrum that confirms the identity of indolelactic acid based on fragmentation ions.

**Figure S6. Metabolomes of one and two member model microbiotas do not reconstitute the metabolomic complexity of a humanized microbiota.** Venn diagram of microbe-dependent metabolites from fecal samples of gnotobiotic mice colonized with *Bacteroides thetaiotaomicron* (BT), BT and *Bifidobacterium longum* (BTBL) or humanized mice (HUM). These features are significantly different from germ free mice fecal metabolites; defined by fold change >10 and p value < 0.01 .

**Figure S7. Humanized mice reproduce some aspect of human fecal metabolome.** RPLC-ESI+ spectra of two features specific to donor 3 and the respective recipient mice.

**Figure S8. Structures of identified compounds.** Chemical structures of verified compounds (see Table S2) and exact masses.

A.

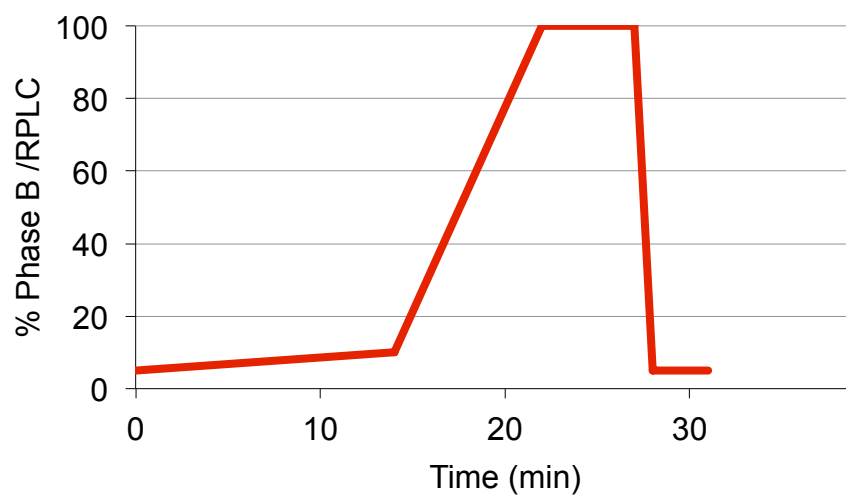

B.

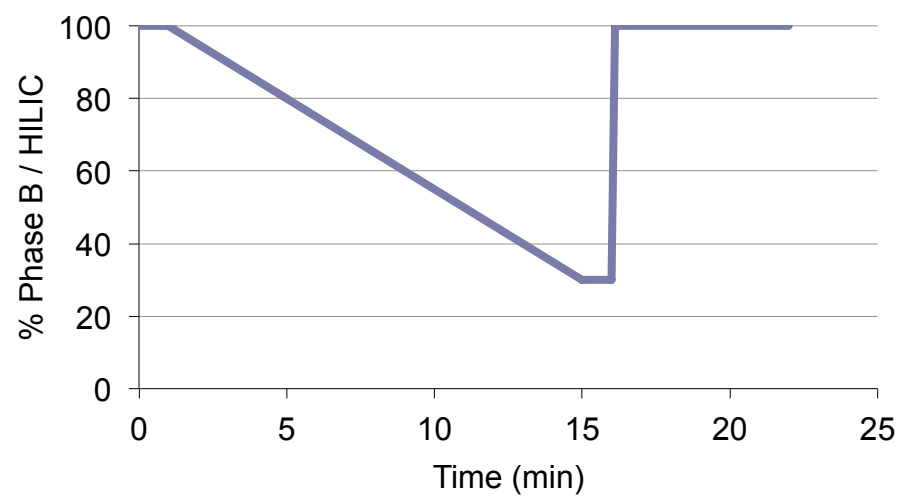

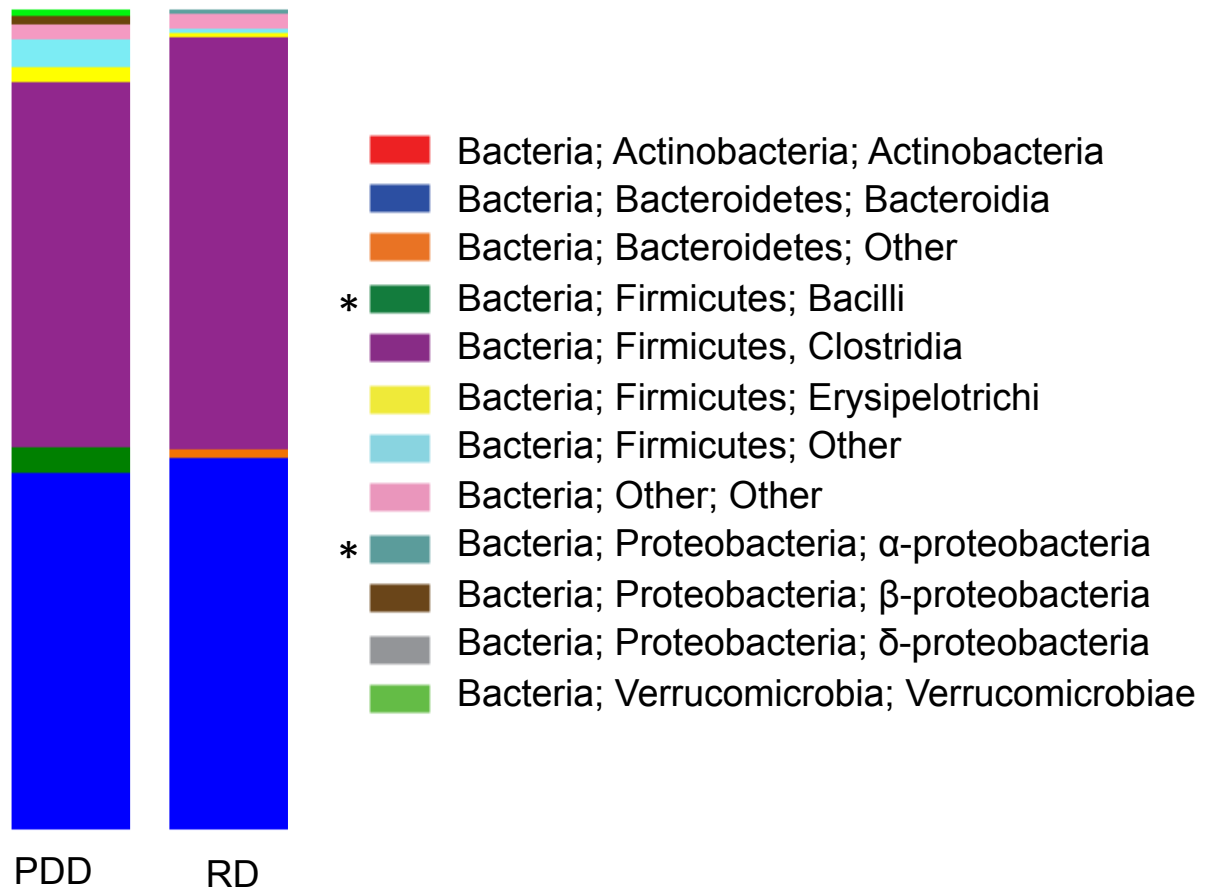

Figure S2.

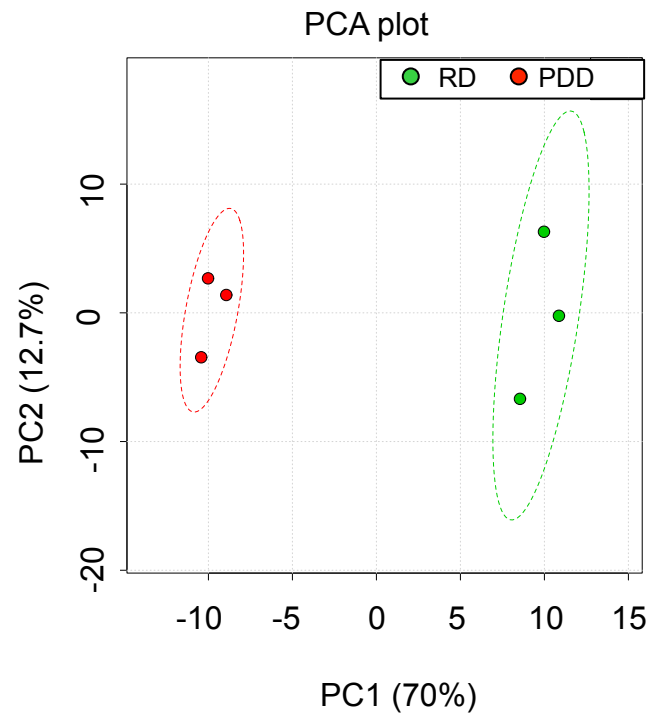

Figure S3.

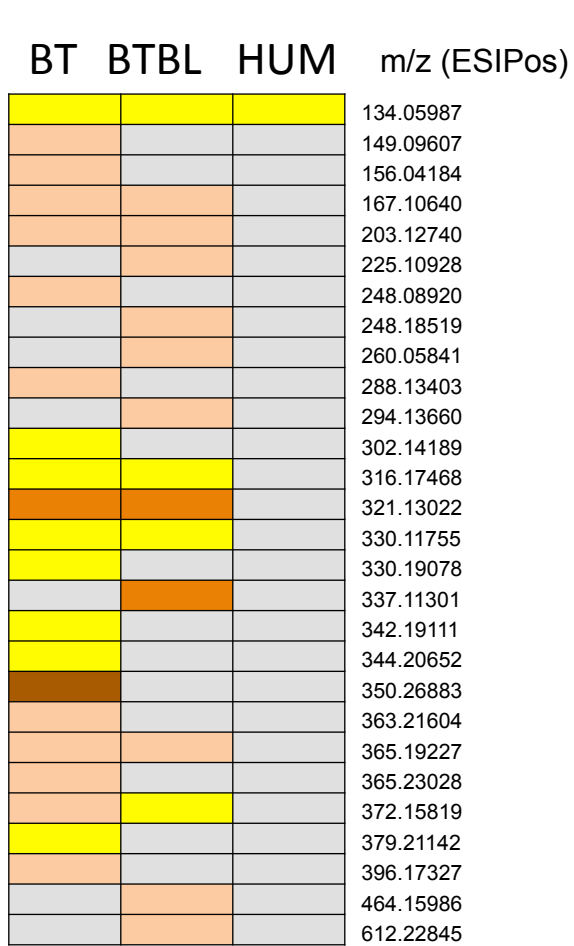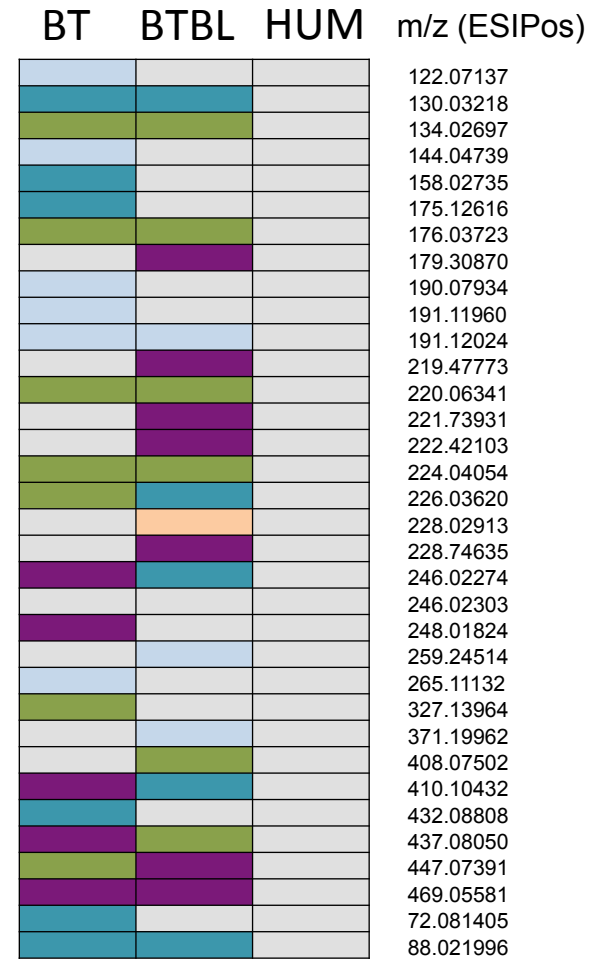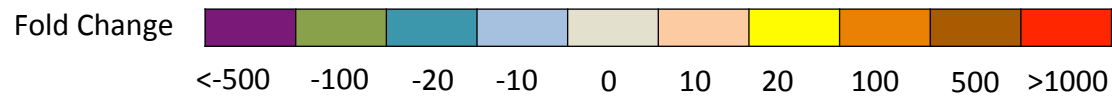

Figure S4.

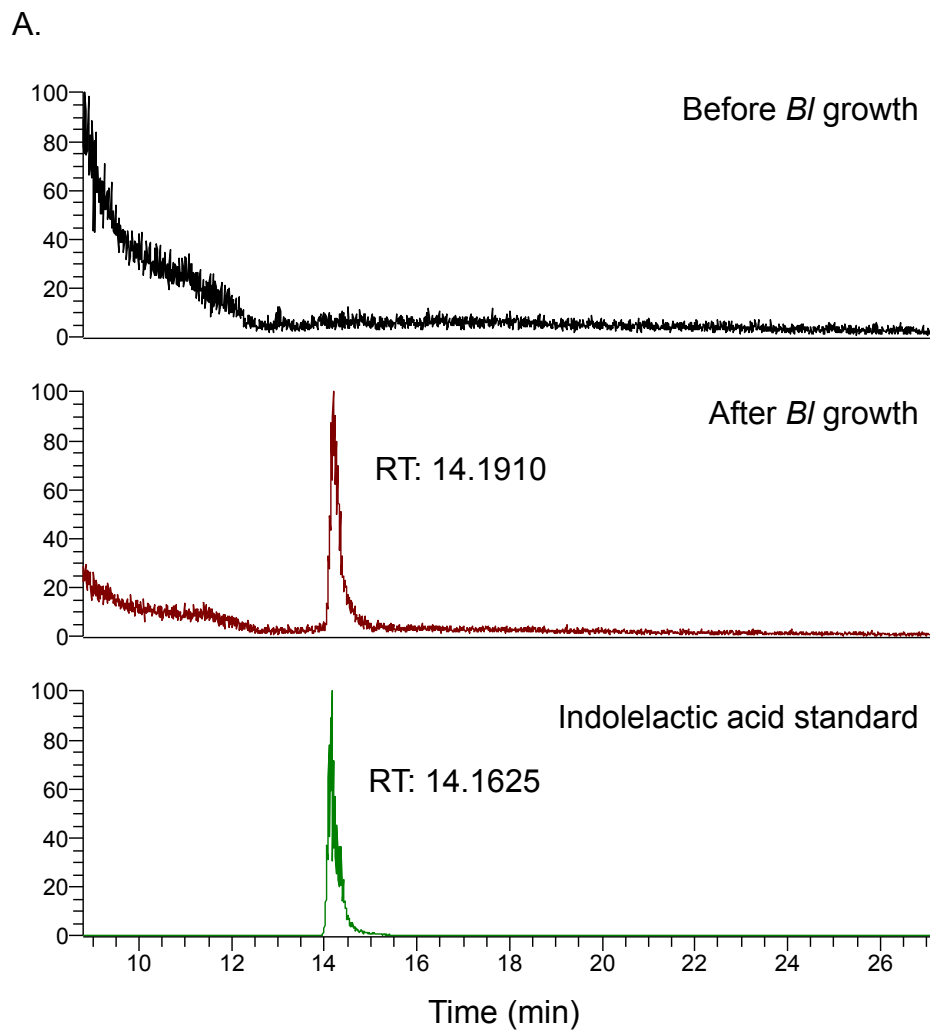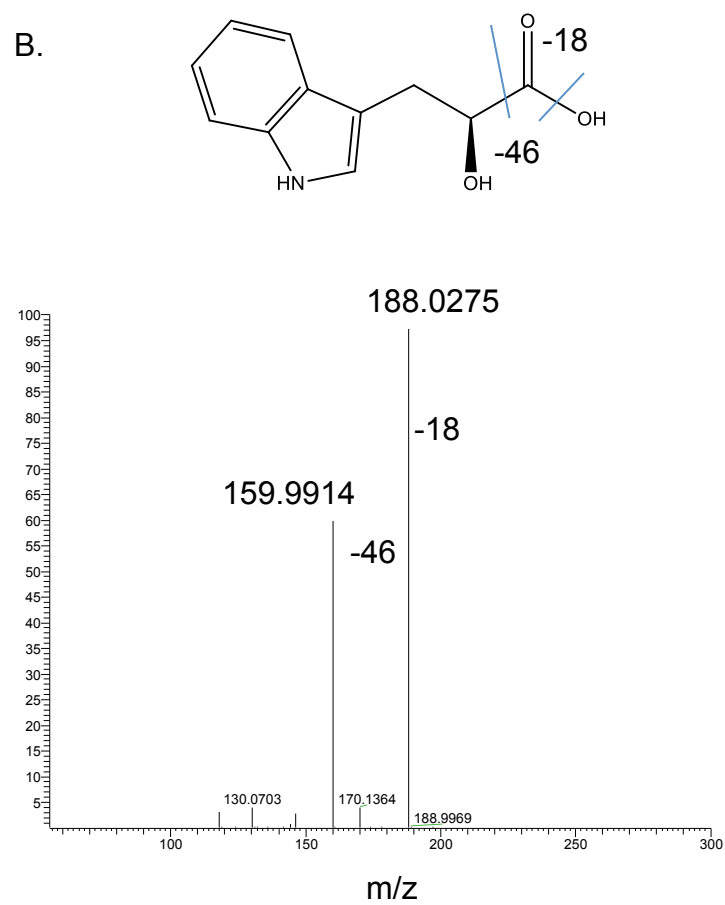

Figure S5.

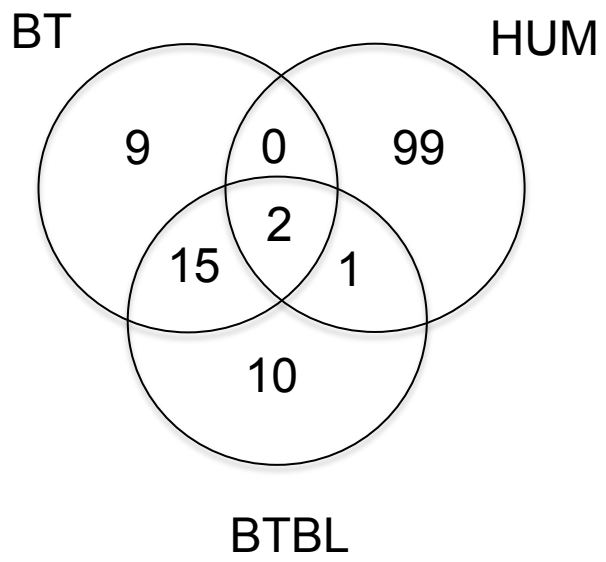

Figure S6.



Human samples  
Base peak: 114.0663 m/z

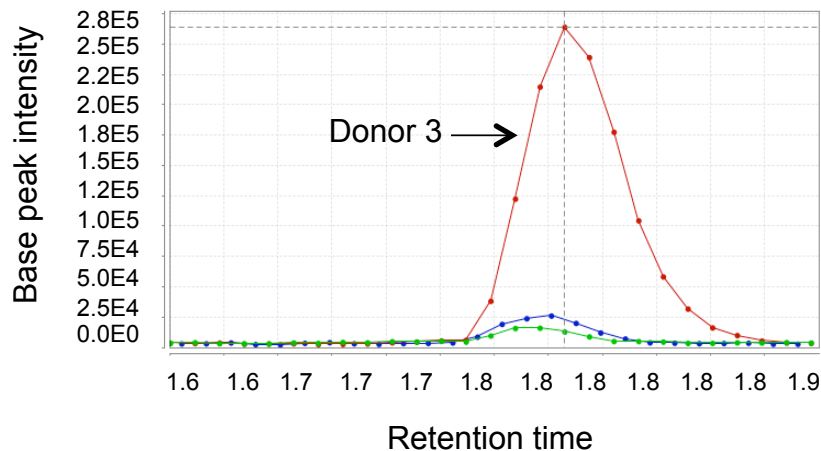

Humanized mice samples  
Base peak: 114.0663 m/z

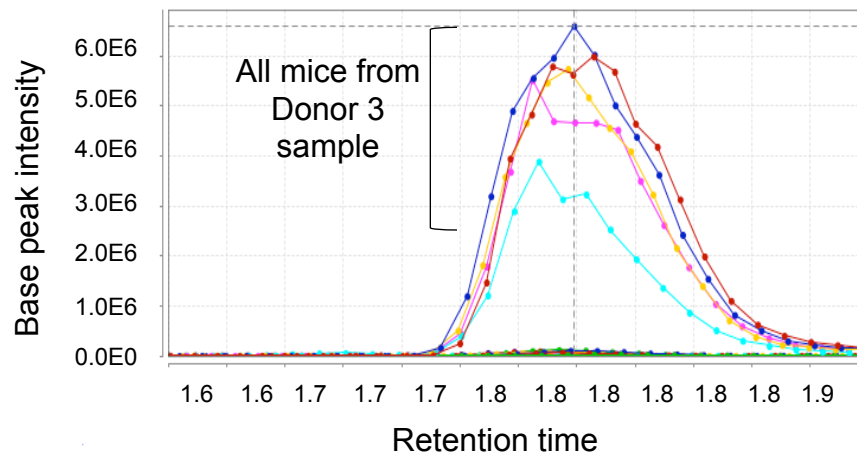

Human samples  
Base peak: 493.280 m/z

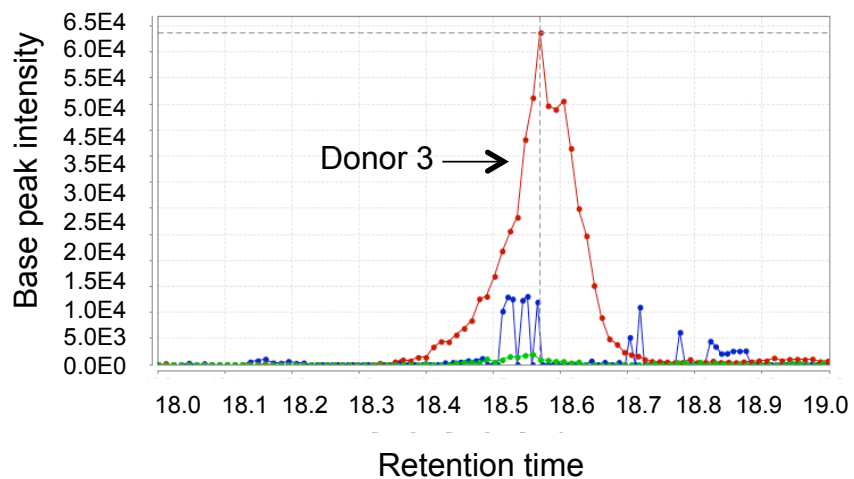

Humanized mice samples  
Base peak: 493.280 m/z

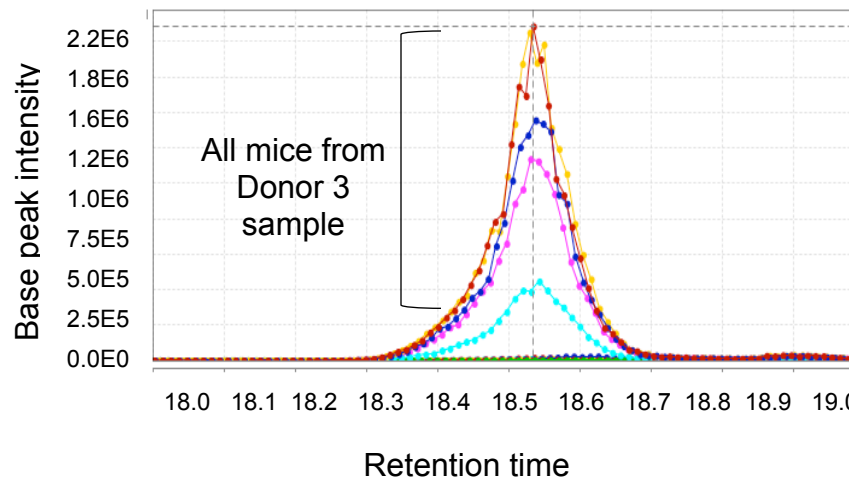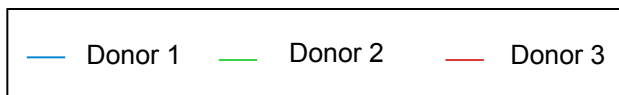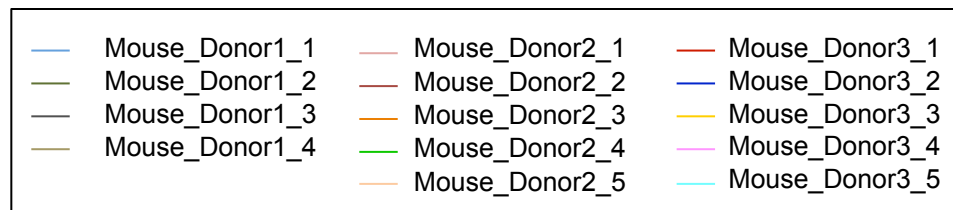

Figure S7.

**Exact Mass: 131.0695**

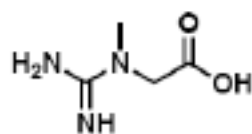

**creatine**

**Exact Mass: 113.0589**

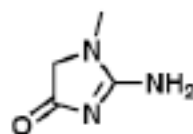

**creatinine**

**Exact Mass: 160.1000**

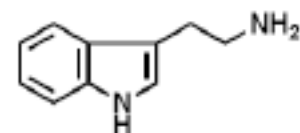

**tryptamine**

**Exact Mass: 133.0528**

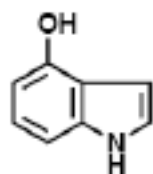

**hydroxyindole**

**Exact Mass: 309.0849**

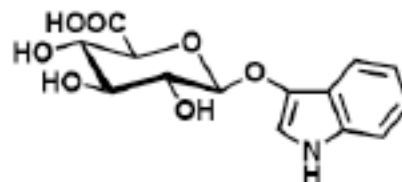

**indoxyl glucuronide**
